# Supplementary material for: Preparation of environment-friendly solid epoxy resin with high-toughnessviaone-step banburying
Source: Royal Society of Chemistry journal article supplement (doi:10.1039/d2ra01302a), 2022-01-01
Supplement: d2ra01302a1.pdf [file d2ra01302a1.pdf]

## Supporting Information

### **Preparation of environment-friendly solid epoxy resin with high-toughness via one-step banburying**

*Gaobo Lou, Qing Li, Qian Jin, Qingqing Rao\*, Shenyuan Fu\*, Jinfeng Dai\**

*School of Chemistry and Materials Engineering, Zhejiang A&F University, Hangzhou  
311300, China.*

Corresponding author:

E-mail: [qqrao@zafu.edu.cn](mailto:qqrao@zafu.edu.cn) (Q.Q. Rao)

E-mail: [jinfengdai0601@gmail.com](mailto:jinfengdai0601@gmail.com) (J.F. Dai)

Email: [fshenyuan@sina.com](mailto:fshenyuan@sina.com) (S.Y. Fu)

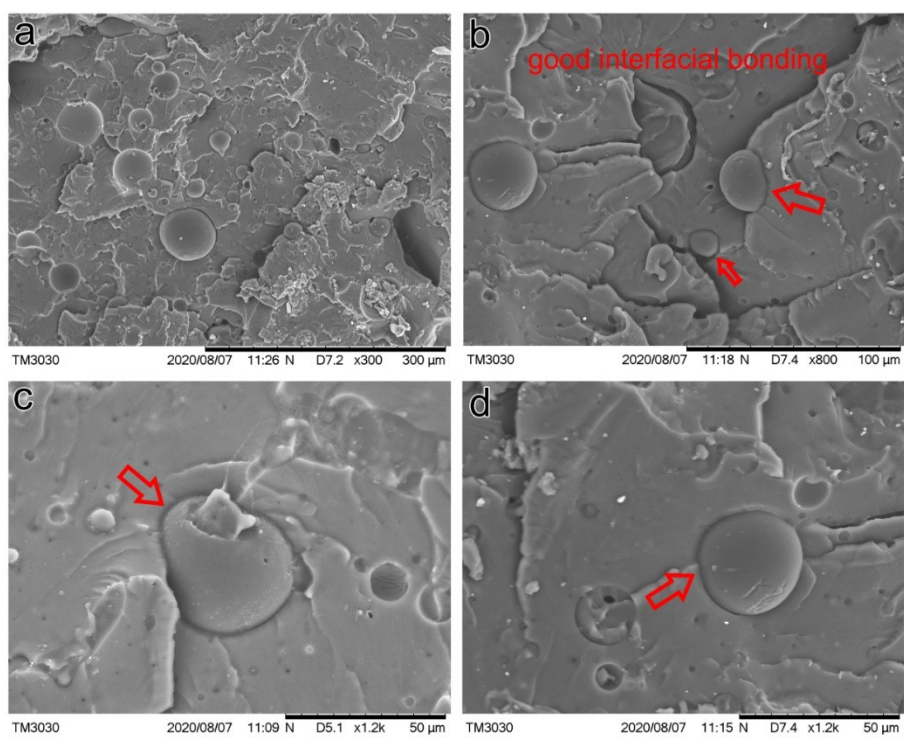

**Fig. S1.** The SEM micrographs of impact fracture surface of R-EM10.

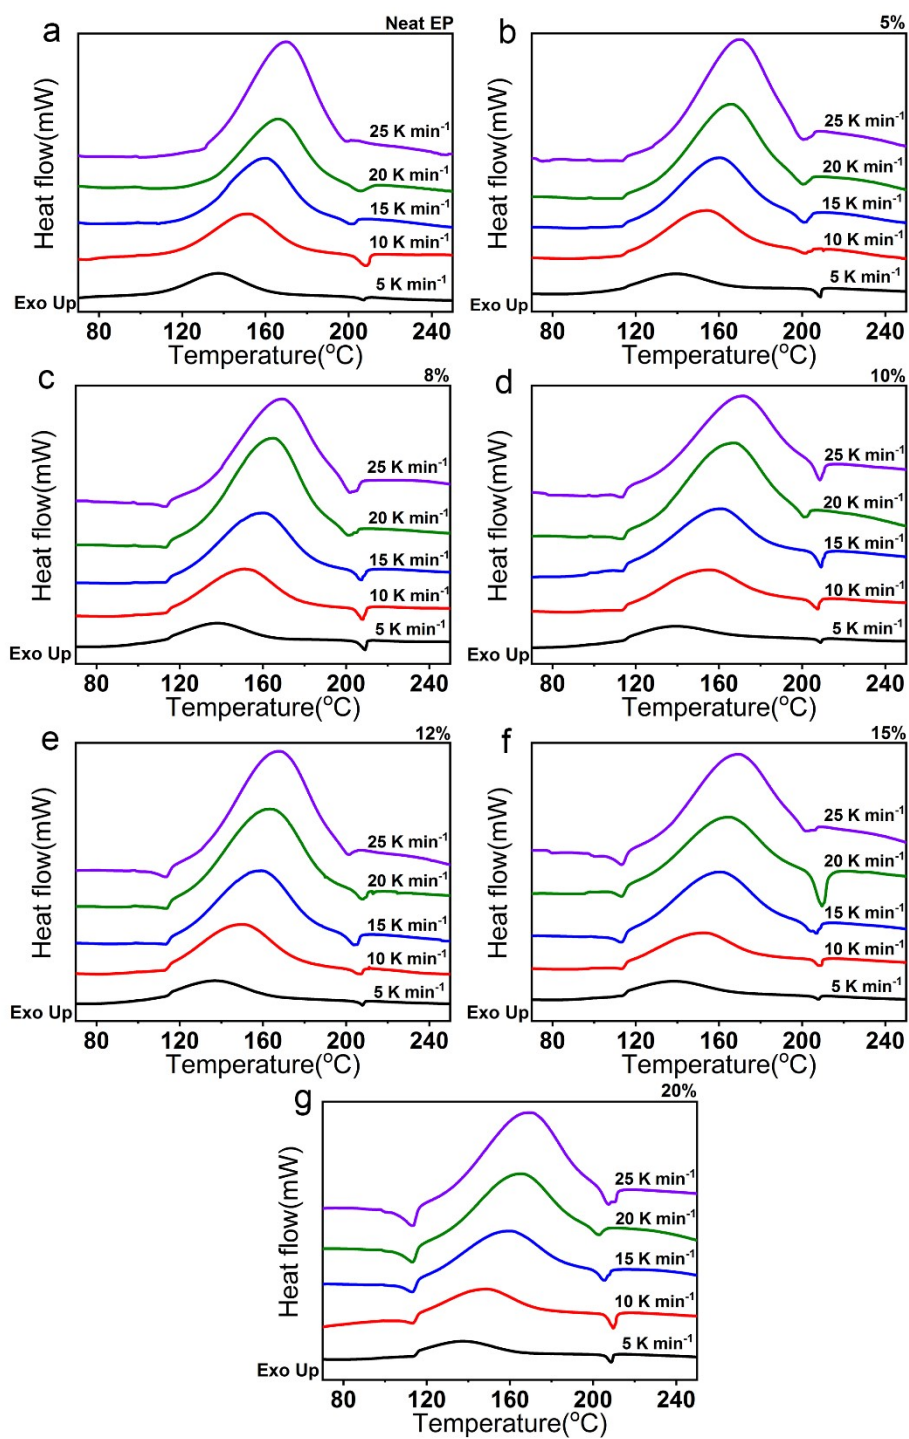

**Fig. S2.** DSC curves of epoxy systems with heat rates of 5, 10, 15, 20, 25 K min<sup>-1</sup>: EVA-g-MAH addition amount of (a) 0 wt%, (b) 5 wt%, (c) 8 wt %, (d) 10 wt %, (e) 12 wt %, (f) 15 wt % and (g) 20 wt %, respectively.

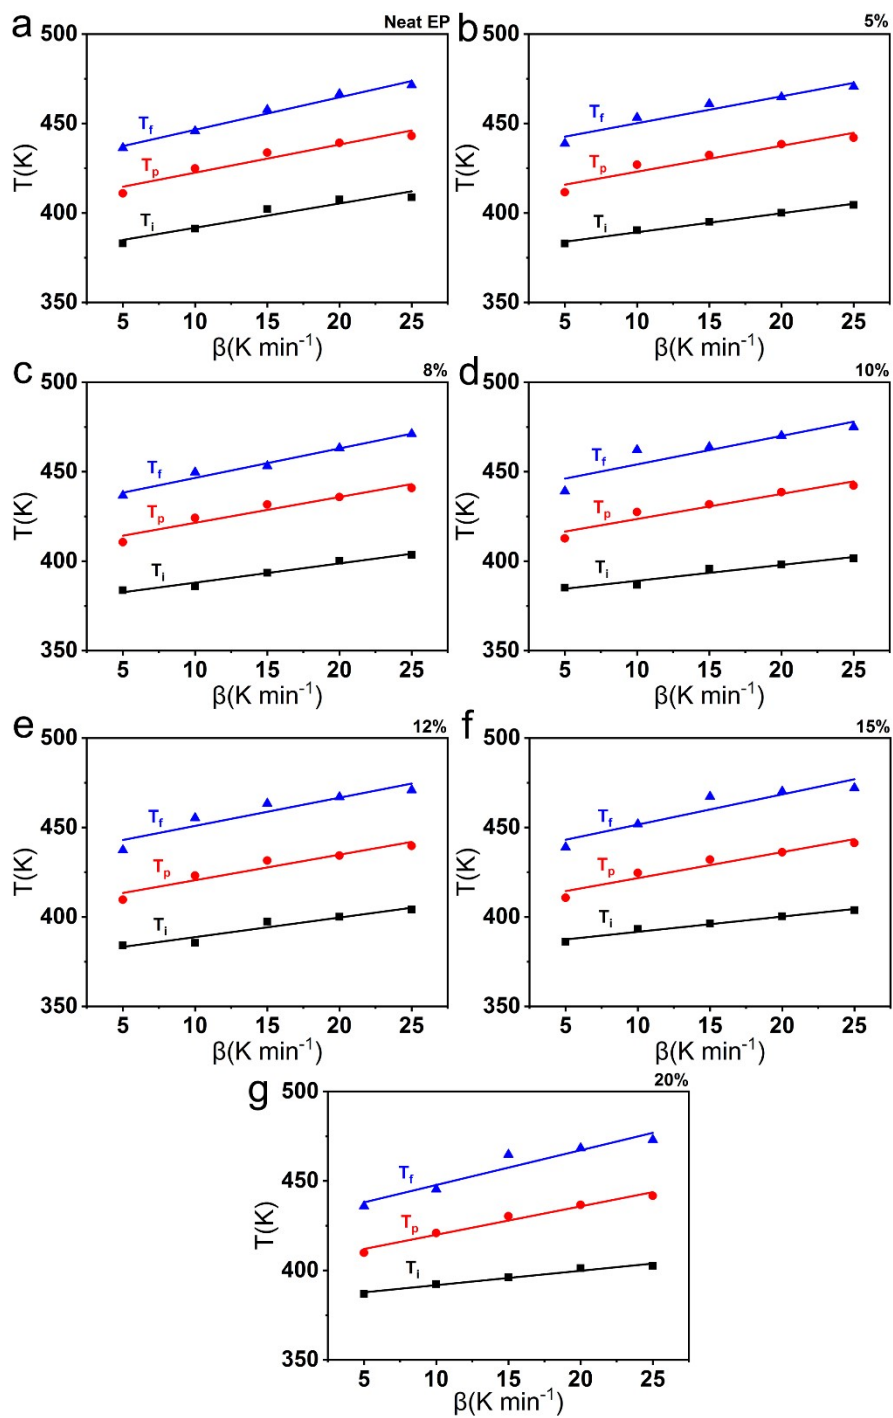

**Fig. S3.** T- $\beta$  diagram of epoxy systems with different content EVA-g-MAH: (a) 0 wt%, (b) 5 wt%, (c) 8 wt %, (d) 10 wt %, (e) 12 wt %, (f) 15 wt % and (g) 20 wt %, respectively.

**Table S1.** DSC curing data of modified epoxy systems with different content EVA-g-MAH

| Systems | $\beta$ (K min <sup>-1</sup> ) | $T_i$ (K) | $T_p$ (K) | $T_f$ (K) | $\Delta H$ (J g <sup>-1</sup> ) |
|---------|--------------------------------|-----------|-----------|-----------|---------------------------------|
| Neat EP | 5                              | 382.93    | 410.97    | 436.36    | 96.60                           |
|         | 10                             | 391.24    | 424.87    | 445.80    | 100.00                          |
|         | 15                             | 402.09    | 433.71    | 457.61    | 103.20                          |
|         | 20                             | 407.51    | 439.22    | 466.47    | 82.79                           |
|         | 25                             | 408.75    | 443.09    | 471.47    | 118.6                           |
| R-EM5   | 5                              | 382.84    | 411.6     | 438.80    | 65.88                           |
|         | 10                             | 390.26    | 426.97    | 453.26    | 84.62                           |
|         | 15                             | 395.02    | 432.35    | 460.89    | 90.26                           |
|         | 20                             | 400.07    | 438.45    | 464.75    | 77.58                           |
|         | 25                             | 404.46    | 442.05    | 470.60    | 95.05                           |
| R-EM8   | 5                              | 383.75    | 410.67    | 436.67    | 74.67                           |
|         | 10                             | 385.91    | 424.19    | 449.66    | 84.64                           |
|         | 15                             | 393.51    | 431.67    | 453.22    | 89.69                           |
|         | 20                             | 400.24    | 435.86    | 463.22    | 100.10                          |
|         | 25                             | 403.46    | 440.88    | 471.10    | 79.90                           |
| R-EM10  | 5                              | 385.14    | 412.72    | 439.14    | 63.14                           |
|         | 10                             | 386.63    | 427.52    | 462.18    | 92.75                           |
|         | 15                             | 395.86    | 431.77    | 463.81    | 73.34                           |
|         | 20                             | 398.15    | 438.63    | 470.08    | 107.97                          |
|         | 25                             | 401.57    | 442.22    | 475.00    | 70.59                           |
| R-EM12  | 5                              | 384.05    | 409.59    | 437.32    | 82.70                           |
|         | 10                             | 385.46    | 423.12    | 455.25    | 97.62                           |
|         | 15                             | 397.34    | 431.56    | 463.36    | 95.14                           |
|         | 20                             | 400.04    | 434.35    | 467.03    | 93.09                           |
|         | 25                             | 404.1     | 439.67    | 470.85    | 85.01                           |
| R-EM15  | 5                              | 386.05    | 410.71    | 438.95    | 64.56                           |
|         | 10                             | 393.21    | 424.61    | 451.84    | 65.16                           |
|         | 15                             | 396.37    | 432.07    | 467.24    | 78.88                           |
|         | 20                             | 400.32    | 436.18    | 470.1     | 65.37                           |

|        |    |        |        |        |       |
|--------|----|--------|--------|--------|-------|
|        | 25 | 403.78 | 441.26 | 472.08 | 66.65 |
|        | 5  | 386.82 | 409.84 | 435.92 | 50.55 |
|        | 10 | 392.35 | 420.89 | 445.34 | 57.44 |
| R-EM20 | 15 | 396.12 | 430.34 | 464.75 | 57.64 |
|        | 20 | 401.25 | 436.64 | 468.32 | 66.09 |
|        | 25 | 402.48 | 441.69 | 473.01 | 67.43 |

**Table S2.** Kinetic parameters of the curing reaction for epoxy systems with different content EVA-g-MAH

| Systems | Kissinger      |                      |                | Ozawa          |                | n      |
|---------|----------------|----------------------|----------------|----------------|----------------|--------|
|         | $E_a$ (KJ/mol) | A(s <sup>-1</sup> )  | R <sup>2</sup> | $E_a$ (KJ/mol) | R <sup>2</sup> |        |
| Neat EP | 67.8           | 9.81×10 <sup>4</sup> | 0.997          | 71.2           | 0.998          | 0.9053 |
| R-EM5   | 73.0           | 4.50×10 <sup>5</sup> | 0.985          | 76.1           | 0.988          | 0.9115 |
| R-EM8   | 73.9           | 6.54×10 <sup>5</sup> | 0.995          | 77.0           | 0.996          | 0.9128 |
| R-EM10  | 76.0           | 1.10×10 <sup>6</sup> | 0.982          | 79.4           | 0.985          | 0.9147 |
| R-EM12  | 73.5           | 6.02×10 <sup>5</sup> | 0.987          | 76.5           | 0.989          | 0.9125 |
| R-EM15  | 73.2           | 5.11×10 <sup>6</sup> | 0.994          | 76.3           | 0.995          | 0.9119 |
| R-EM20  | 67.9           | 1.14×10 <sup>6</sup> | 0.992          | 71.2           | 0.994          | 0.9056 |

**Table S3.** Gelation, curing and post-treatment temperature of epoxy systems with different content EVA-g-MAH

| Systems | $T_{gel}$ (K) | $T_{cure}$ (K) | $T_{treat}$ (K) |
|---------|---------------|----------------|-----------------|
| Neat EP | 378.1         | 406.8          | 428.3           |
| R-EM5   | 378.6         | 408.6          | 435.1           |
| R-EM8   | 377.2         | 407.0          | 430.0           |
| R-EM10  | 380.2         | 409.5          | 438.2           |
| R-EM12  | 377.8         | 406.2          | 435.1           |
| R-EM15  | 383.2         | 407.2          | 434.7           |
| R-EM20  | 383.7         | 404.0          | 428.3           |

**Table S4.** DMA parameters of epoxy systems with different content EVA-g-MAH

| <b>Systems</b> | <b>T<sub>g</sub>(°C)</b> | <b>E' at T<sub>g</sub> +30 °C (MPa)</b> | <b>v<sub>c</sub> (*10<sup>3</sup> mol/m<sup>3</sup>)</b> |
|----------------|--------------------------|-----------------------------------------|----------------------------------------------------------|
| Neat EP        | 111.09                   | 1.68                                    | 0.163                                                    |
| R-EM5          | 113.45                   | 3.51                                    | 0.338                                                    |
| R-EM8          | 112.66                   | 3.62                                    | 0.349                                                    |
| R-EM10         | 111.48                   | 1.95                                    | 0.189                                                    |
| R-EM12         | 110.10                   | 2.76                                    | 0.268                                                    |
| R-EM15         | 112.52                   | 6.00                                    | 0.579                                                    |
| R-EM20         | 114.24                   | 4.44                                    | 0.426                                                    |

**Table S5.** Characteristic parameters of the neat epoxy and EVA-g-MAH modified epoxy systems from the thermogravimetric plots.

| <b>Systems</b> | <b>T<sub>5%</sub>(°C)</b> | <b>T<sub>max</sub>(°C)</b> | <b>Char yield at 800 °C (%)</b> |
|----------------|---------------------------|----------------------------|---------------------------------|
| Neat EP        | 368.1                     | 444.1                      | 1.5                             |
| R-EM5          | 365.6                     | 445.6                      | 0.4                             |
| R-EM8          | 372.2                     | 446.3                      | 4.0                             |
| R-EM10         | 380.7                     | 449.1                      | 8.5                             |
| R-EM12         | 378.4                     | 445.9                      | 6.5                             |
| R-EM15         | 375.8                     | 447.1                      | 7.7                             |
| R-EM20         | 376.9                     | 449.5                      | 6.4                             |
